# Supplementary material
Source: PubMed Central journal article supplement (PMC5651145)
Supplement: NIHMS912180-supplement-Supplemental.pdf [file NIHMS912180-supplement-Supplemental.pdf]

Supplementary Materials for “Sustained Anterior Cingulate Cortex Activation during Reward Processing Predicts Response to Psychotherapy in Major Depressive Disorder”

Table S1. Whole brain analyses of global activation (i.e., runs 1 and 2 combined) for the reward anticipation condition. Clusters are thresholded at  $z > 4.0$ ,  $p < 0.005$  (corrected),  $\geq 10$  contiguous voxels; MNI coordinates reflect the maximum voxel of intensity for each cluster;  $k$  = voxels in each cluster; R: right, L: left; ACC: Anterior Cingulate Cortex. There were no significant clusters reflecting group differences for this condition.

Control Group:

| Region                   | Right/left | MNI coordinates |     |     | k   | Peak z-score |
|--------------------------|------------|-----------------|-----|-----|-----|--------------|
|                          |            | X               | Y   | Z   |     |              |
| Nucleus Accumbens        | R          | 12              | 8   | -10 | 52  | 4.46         |
| Orbital Frontal Cortex   | L          | -34             | 20  | -12 | 100 | 4.92         |
| Subcallosal Cortex       | L          | -6              | 14  | -12 | 53  | 4.60         |
| Insula                   | R          | 36              | 16  | 0   | 428 | 5.31         |
| Thalamus                 | R          | 4               | -18 | 6   | 85  | 4.46         |
| Lateral Occipital Cortex | R          | 48              | -76 | -4  | 281 | 5.22         |
|                          | L          | -38             | -88 | 4   | 143 | 4.83         |
|                          | L          | -48             | 64  | -12 | 68  | 4.68         |
| Cuneus/Occipital Lobe    | R          | 20              | -74 | 10  | 61  | 4.60         |
|                          | R          | 12              | -92 | 16  | 135 | 5.06         |
| Precuneus                | R          | 14              | -66 | 44  | 71  | 4.63         |
|                          | L          | -6              | -76 | 50  | 38  | 4.56         |
| Precentral Gyrus         | L          | -44             | -4  | 54  | 40  | 4.92         |
| Superior Parietal Lobe   | R          | 30              | -54 | 40  | 73  | 4.76         |
|                          | L          | -26             | -54 | 68  | 32  | 4.71         |

MDD Group:

| Region                    | Right/left | MNI coordinates |     |    | k    | Peak z-score |
|---------------------------|------------|-----------------|-----|----|------|--------------|
|                           |            | X               | Y   | Z  |      |              |
| <i>Local Maxima</i>       | -          | -               | -   |    | 3866 | -            |
| Putamen                   | L          | -26             | -14 | 8  | -    | 5.11         |
| Pallidum                  | L          | -16             | -6  | 0  | -    | 5.18         |
| Insula                    | L          | -30             | 20  | -2 | -    | 5.37         |
| Thalamus                  | L          | -10             | -8  | -2 | -    | 5.47         |
| ACC / Paracingulate Gyrus | R / L      | 2               | 6   | 52 | 1463 | 5.24         |
|                           | R          | 8               | 32  | 20 | 38   | 4.84         |
| Frontal Pole              | R          | 34              | 48  | 22 | 75   | 4.53         |
|                           | L          | -38             | 50  | 18 | 85   | 4.35         |
| Insula                    | R          | 36              | 4   | -4 | 44   | 4.68         |
| Lateral Occipital Cortex  | R          | 48              | -76 | -6 | 423  | 5.58         |
|                           | L          | -44             | -72 | -6 | 662  | 5.51         |
|                           | L          | -26             | -62 | 56 | 376  | 4.99         |
| Occipital Pole            | R          | 16              | -94 | 18 | 103  | 5.24         |
|                           | L          | -8              | -98 | 8  | 50   | 4.76         |
| Precuneus Cortex          | R          | 14              | -68 | 38 | 612  | 5.44         |
| Intracalcarine Cortex     | L          | -4              | -76 | 16 | 105  | 4.54         |
| Precentral Gyrus          | R          | 54              | 0   | 48 | 64   | 4.45         |
|                           | L          | -44             | -6  | 52 | 44   | 4.75         |
|                           | L          | -40             | -20 | 60 | 44   | 4.34         |
| Supramarginal Gyrus       | L          | -38             | -40 | 40 | 166  | 4.82         |
|                           | L          | -52             | -30 | 40 | 35   | 4.37         |
| Superior Frontal Gyrus    | R          | 18              | 2   | 54 | 115  | 4.81         |

Table S2. Whole brain analyses for global activation (i.e., runs combined) for the reward outcome condition. All clusters are thresholded at  $z=4.5$ ,  $p<0.005$  (corrected),  $\geq 10$  contiguous voxels; MNI coordinates reflect the maximum voxel of intensity for each cluster;  $k$  = number of voxels in each cluster; R: right, L: left; ACC: Anterior Cingulate Cortex. There were no significant clusters reflecting group differences for this condition. There were no significant clusters reflecting group differences for this condition.

Control Group:

| Region                 | Right/left | MNI coordinates |    |     | k  | Peak z-score |
|------------------------|------------|-----------------|----|-----|----|--------------|
|                        |            | X               | Y  | Z   |    |              |
| ACC                    | R          | 6               | 38 | 8   | 28 | 4.92         |
| Orbital Frontal Cortex | R          | 32              | 18 | -16 | 15 | 5.18         |
| Subcallosal Cortex     | R          | 2               | 16 | -6  | 39 | 5.3          |

MDD Group:

| Region | Right/left | MNI coordinates |    |    | k  | Peak z-score |
|--------|------------|-----------------|----|----|----|--------------|
|        |            | X               | Y  | Z  |    |              |
| ACC    | R          | -2              | 38 | 14 | 23 | 4.93         |
| ACC    | R          | 8               | 38 | 20 | 10 | 4.80         |

Table S3. Within-group whole brain analyses for sustained activation (Run 1 > Run 2) for the reward anticipation condition. All clusters are thresholded at  $z=2.8$ ,  $p<0.005$  (corrected),  $\geq 10$  contiguous voxels; MNI coordinates reflect the maximum voxel of intensity for each cluster;  $k$  = number of voxels in each cluster; Area; R: right, L: left. There were no significant clusters for the control group for this condition. There were no significant clusters reflecting group differences for this condition.

MDD Group:

| Region              | Right/left | MNI coordinates |     |    | k  | Peak z-score |
|---------------------|------------|-----------------|-----|----|----|--------------|
|                     |            | X               | Y   | Z  |    |              |
| Precuneus Cortex    | R          | 2               | -54 | 14 | 12 | 2.96         |
| Posterior Cingulate | L          | -4              | 20  | 40 | 19 | 3.36         |
|                     | L          | -2              | -34 | 44 | 12 | 3.19         |

Table S4. Within-group whole brain analyses for sustained activation (Run 1 > Run 2) for the reward outcome condition. All clusters are thresholded at  $z=4.0$ ,  $p<0.005$  (corrected),  $\geq 10$  contiguous voxels; MNI coordinates reflect the maximum voxel of intensity for each cluster;  $k$  = number of voxels in each cluster; Area; R: right, L: left; ACC. There were no significant clusters for the control group for this condition. There were no significant clusters reflecting group differences for this condition.

MDD Group:

| Region           | Right/left | MNI coordinates |     |    | k  | Peak z-score |
|------------------|------------|-----------------|-----|----|----|--------------|
|                  |            | X               | Y   | Z  |    |              |
| Precuneus Cortex | L          | 0               | -36 | 50 | 17 | 4.36         |
